# Supplementary material for: TREC/KREC Levels in Young COVID-19 Patients
Source: MDPI journal article supplement (doi:10.3390/diagnostics11081486), 2021-08-16
Supplement: s1 [file s1]

## Supplementary Materials

# TREC/KREC Levels in Young COVID-19 Patients

Maryam B. Khadzhieva <sup>1,2,3,\*</sup>, Ekaterina V. Kalinina <sup>2</sup>, Sergey S. Larin <sup>2</sup>, Daria A. Sviridova <sup>3</sup>, Alesya S. Gracheva <sup>1,3</sup>, Julia V. Chursinova <sup>4</sup>, Vadim A. Stepanov <sup>4</sup>, Ivan V. Redkin <sup>1</sup>, Lyudmila S. Avdeikina <sup>5</sup>, Alexander G. Rumyantsev <sup>2</sup>, Artem N. Kuzovlev <sup>1</sup> and Lyubov E. Salnikova <sup>1,2,3</sup>

<sup>1</sup> Federal Research and Clinical Center of Intensive Care Medicine and Rehabilitology, 107031 Moscow, Russia; palesa@yandex.ru (A.S.G.); redkin70@mail.ru (I.V.R.); artem\_kuzovlev@fnkcr.ru (A.N.K.); salnikovalyubov@gmail.com (L.E.S.)

<sup>2</sup> Dmitry Rogachev National Research Center of Pediatric Hematology, Oncology and Immunology, 117997 Moscow, Russia; ek.v.chernyshova@gmail.com (E.V.K.); sergei\_larin@mail.ru (S.S.L.); alexrum47@mail.ru (A.G.R.)

<sup>3</sup> Vavilov Institute of General Genetics, Russian Academy of Sciences, 119991 Moscow, Russia; daria\_sv11@mail.ru

<sup>4</sup> M.F. Vladimirovsky Moscow Regional Research and Clinical Institute, 129110 Moscow, Russia; yu.chursinova@monikiweb.ru (J.V.C.); vedmak\_@rambler.ru (V.A.S.)

<sup>5</sup> Moscow Clinical Center for Infectious Diseases “Voronovskoe”, 142160 Moscow, Russia; saenko.doc@gmail.com

\* Correspondence: mkhadzhieva@fnkcr.ru; Tel.: +7-9636742099

**Table S1.** Primer and probe sequences of TREC, KREC, and albumin.

| Target | Primer or Probe | Sequence (5' > 3')             |
|--------|-----------------|--------------------------------|
| TREC   | Forward         | CACATCCCTTTCAACCATGCT          |
|        | Reverse         | TGCAGGTGCCTATGCATCA            |
|        | Probe           | ACACCTCTGGTTTTTGTAAGGTGCCCCACT |
| KREC   | Forward         | TAAGCTTTCAGCGCCCATTA           |
|        | Reverse         | CTCCAGGAGCCAGCTCTTAC           |
|        | Probe           | CTGTCTCTTTCCTTAGTGGCATTATTG    |
| ALB    | Forward         | TGAAACATACGTTCCCAAAGAGTTT      |
|        | Reverse         | CTCTCCTTCTCAGAAAGTGTGCATAT     |
|        | Probe           | TGAGATGCCTGCTGACTTGCTTC A      |

**Table S2.** Comparison of clinical characteristics and laboratory findings between ARDS and non-ARDS COVID-19 patients.

| Parameter                                                       | non-ARDS (n = 26)   | ARDS (n = 10)       | p-Value      | FDR Adjusted p-Value |
|-----------------------------------------------------------------|---------------------|---------------------|--------------|----------------------|
| Age, years                                                      | 37.50 (32.00–44.00) | 39.00 (25.50–44.50) | 0.903        | 0.939                |
| Male                                                            | 15 (57.69%)         | 6 (60.00%)          | 0.931        | 0.939                |
| Day of illness at the time of analysis                          | 12.00 (8.00–20.00)  | 14.00 (7.50–28.00)  | 0.520        | 0.715                |
| WBC, × 10 <sup>9</sup> /L                                       | 5.83 (2.85–10.30)   | 6.19 (4.15–14.84)   | 0.320        | 0.689                |
| Lymphocyte count, × 10 <sup>9</sup> /L                          | 1.73 (0.71–2.84)    | 0.86 (0.50–2.46)    | <b>0.014</b> | 0.077                |
| Neutrophils, × 10 <sup>9</sup> /L                               | 3.00 (1.42–8.56)    | 5.33 (2.90–14.37)   | <b>0.049</b> | 0.180                |
| RBC, × 10 <sup>9</sup> /L                                       | 4.49 (4.02–5.34)    | 4.42 (3.44–5.37)    | 0.376        | 0.689                |
| NLR                                                             | 1.83 (0.70–10.31)   | 8.08 (1.15–29.94)   | <b>0.002</b> | <b>0.022</b>         |
| Platelets, × 10 <sup>9</sup> /L                                 | 280 (185–375)       | 270 (188–435)       | 0.939        | 0.939                |
| IL-6R inhibitors (tocilizumab, olokizumab)                      | 7 (26.92%)          | 4 (40.00%)          | 0.454        | 0.713                |
| Corticosteroids (dexamethasone, prednisone, methylprednisolone) | 10 (38.46%)         | 7 (70.00%)          | 0.139        | 0.382                |

The data are presented as median and interquartile range (10–90<sup>th</sup> percentiles) or n (%). p-values comparing ARDS and non-ARDS patients were obtained from Mann-Whitney U test and two-sided Fisher exact test. Significant differences ( $p < 0.05$ ) are shown in bold. NLR—neutrophil-to-lymphocyte ratio; RBC—red blood cells; WBC—white blood cells.

**Table S3.** Comparison of TREC/KREC levels between survivor and non-survivor COVID-19 patients.

| Variable                          | Survivors ( <i>n</i> = 32) | Non-Survivors ( <i>n</i> = 4) | <i>p</i> -Value | FDR Adjusted <i>p</i> -Value |
|-----------------------------------|----------------------------|-------------------------------|-----------------|------------------------------|
| TREC/100000 cells                 | 69.04 (4.05–247.31)        | 4.17 (0.94–9.71)*             | 0.008           | 0.016                        |
| TREC/WBC in 1 µL of blood         | 4.03 (0.23–12.87)          | 0.62 (0.14–1.10)*             | 0.018           | 0.018                        |
| TREC/lymphocytes in 1 µL of blood | 0.08 (0.001–0.34)          | 0.003 (0.00–0.01)*            | 0.014           | 0.017                        |
| KREC/100000 cells                 | 582.37 (79.01–1486.39)     | 66.61 (11.41–136.92)*         | 0.007           | 0.016                        |
| KREC/WBC in 1 µL of blood         | 32.99 (6.06–126.45)        | 4.58 (1.05–18.72)*            | 0.014           | 0.017                        |
| KREC/lymphocytes in 1 µL of blood | 10.19 (0.83–38.10)         | 0.54 (0.11–0.71)*             | 0.003           | 0.016                        |

The data are presented as median and interquartile range (10–90<sup>th</sup> percentiles). *p*-values for the differences between survivors and non-survivors were obtained from Mann-Whitney U test. \*–median and (25–75<sup>th</sup>) percentiles.

**Table S4.** Correlation of TREC/KREC levels and NLR.

| Correlation Pairs                      | <i>n</i> | Spearman's $\rho$ | <i>p</i> -Value |
|----------------------------------------|----------|-------------------|-----------------|
| NLR & TREC/100000 cells                | 34       | –0.726            | 0.000001        |
| NLR & TREC/WBC in 1µL of blood         | 34       | –0.595            | 0.000206        |
| NLR & TREC/lymphocytes in 1µL of blood | 34       | –0.701            | 0.000004        |
| NLR & KREC/100000 cells                | 34       | –0.579            | 0.000330        |
| NLR & KREC/WBC in 1µL of blood         | 34       | –0.391            | 0.022390        |
| NLR & KREC/lymphocytes in 1µL of blood | 34       | –0.691            | 0.000006        |
| Missing                                | 2        |                   |                 |

*n* is the total number of patients with available data.
